# Supplementary material for: Constructing heterostructured FeS2/CuS nanospheres as high rate performance lithium ion battery anodes
Source: Royal Society of Chemistry journal article supplement (doi:10.1039/c9qi01674k), 2020-01-01
Supplement: c9qi01674k1.pdf [file c9qi01674k1.pdf]

*Supporting information*

**Constructing heterostructured FeS<sub>2</sub>/CuS nanospheres as high rate performance  
lithium ion battery anodes**

Xiaoxia Xu, Lingjie Li, Huiqing Chen, Jing Liu, XiaoSong Guo, Zhonghua Zhang,

Changming Mao\*\*, and Guicun Li\*

College of Materials Science and Engineering, Qingdao University of Science and  
Technology, Qingdao 266042, China.

E-mail: [mcm@qust.edu.cn](mailto:mcm@qust.edu.cn) and [guicunli@qust.edu.cn](mailto:guicunli@qust.edu.cn)

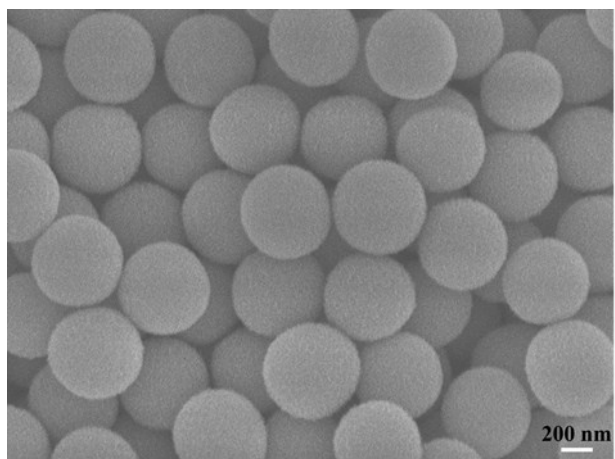

**Fig. S1** SEM images of the Gly-Fe.

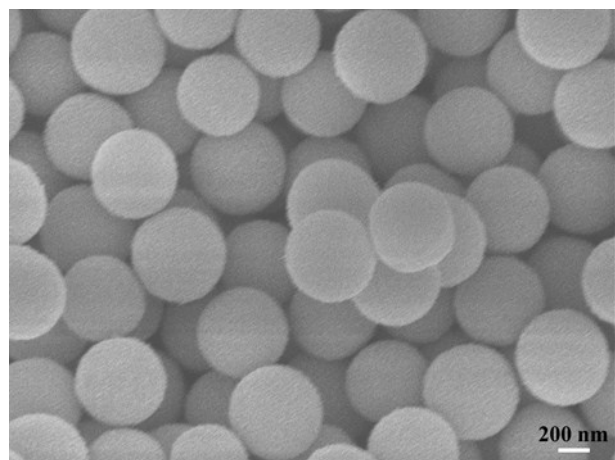

**Fig. S2** SEM images of the  $\text{Fe}_2\text{O}_3$ .

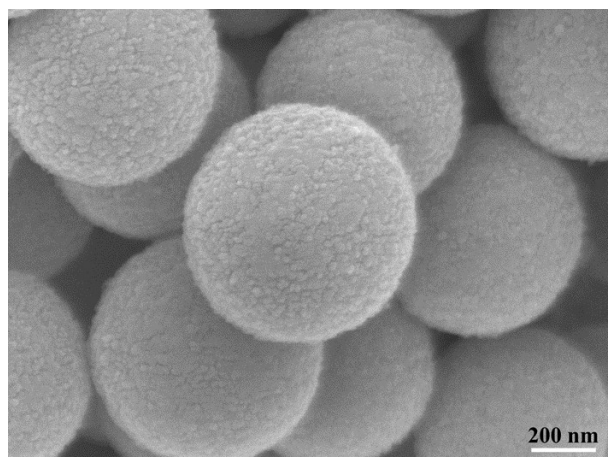

**Fig. S3** SEM images of the pristine FeS<sub>2</sub>.

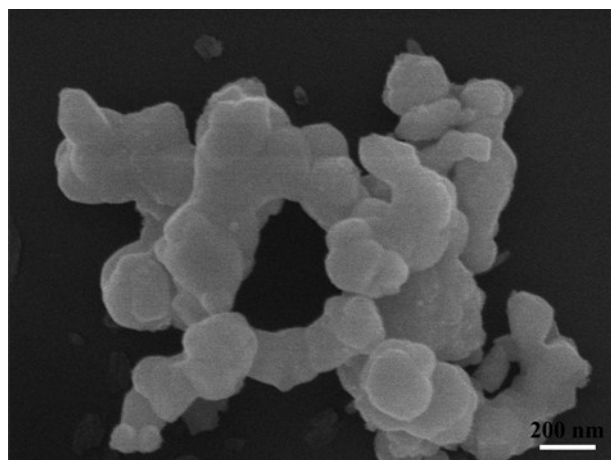

**Fig. S4** SEM images of the pristine CuS.

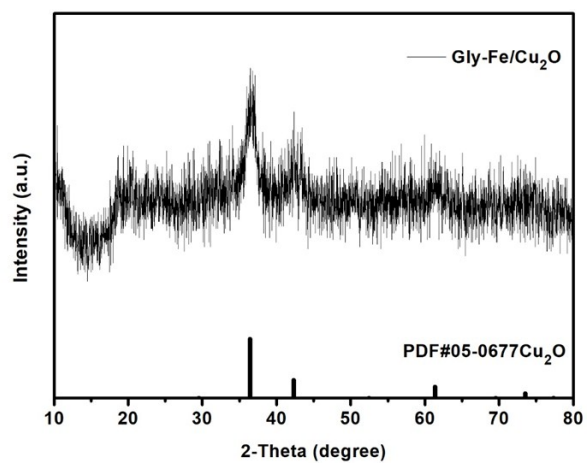

**Fig. S5** XRD images of the Gly-Fe/Cu<sub>2</sub>O.

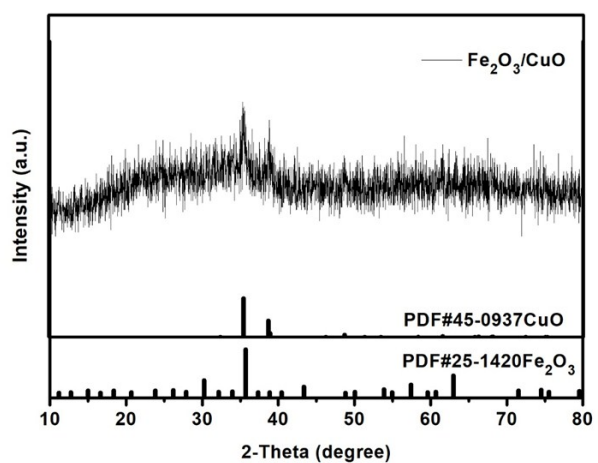

**Fig. S6** XRD images of the Fe<sub>2</sub>O<sub>3</sub>/CuO.

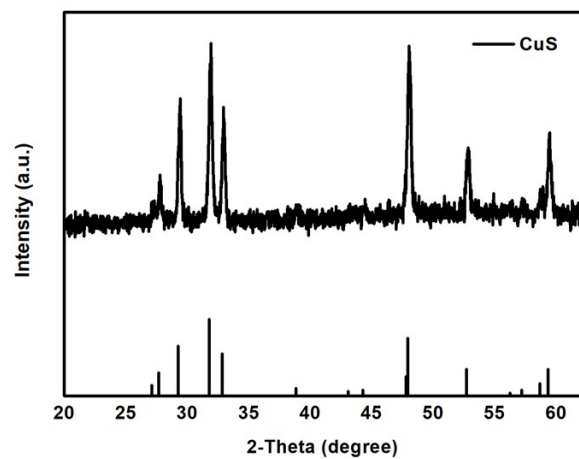

**Fig. S7** XRD images of the pristine CuS.

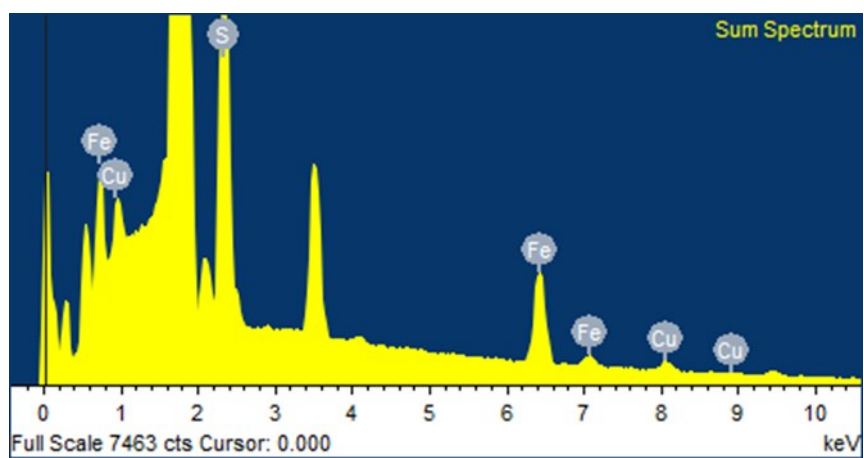

**Fig. S8** The EDX spectrum of the HFCSMs.

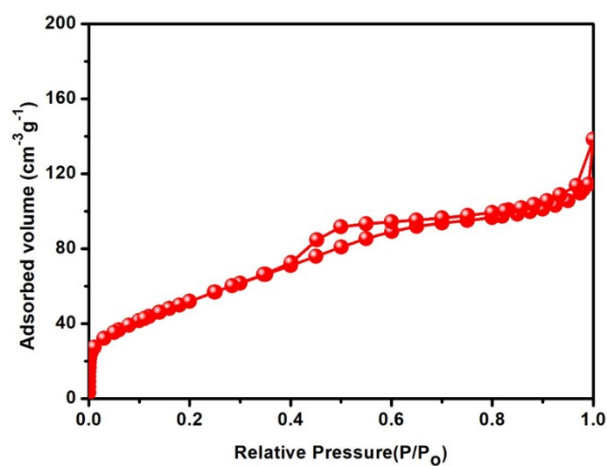

**Fig. S9** N<sub>2</sub> adsorption-desorption isotherm loop of the Fe<sub>2</sub>O<sub>3</sub>/CuO.

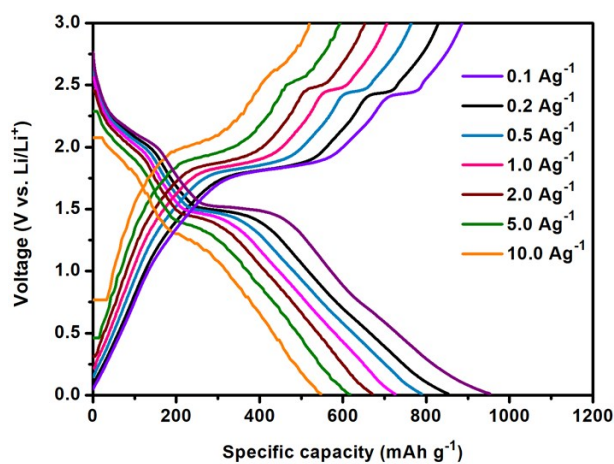

**Fig. S10** Galvanostatic discharge-charge profiles of the HFCSs electrode at different current densities.

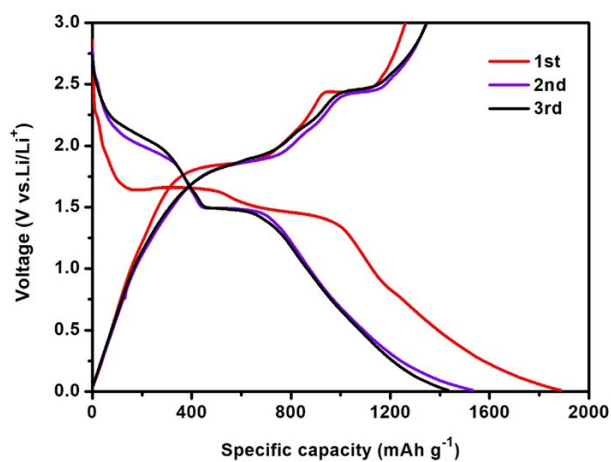

**Fig. S11** Galvanostatic discharge-charge profiles of the pristine FeS<sub>2</sub> electrode at 0.1

A g<sup>-1</sup>.

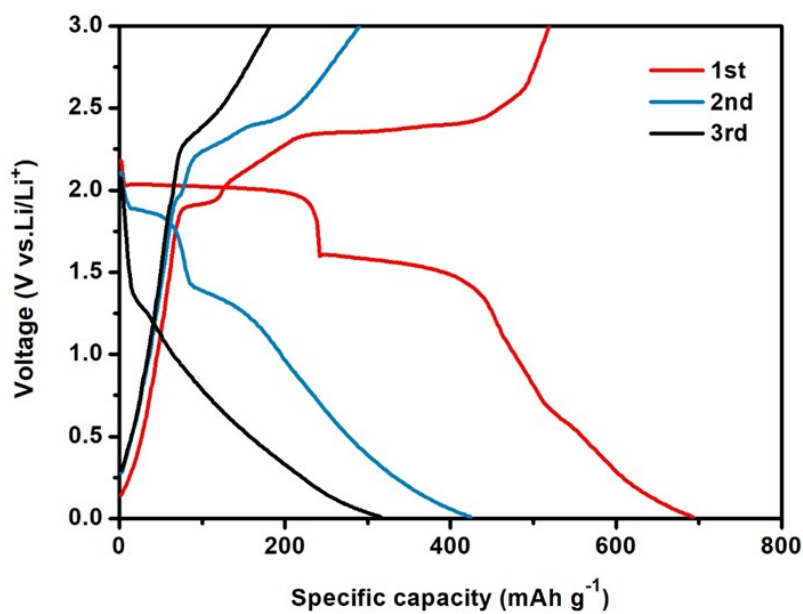

**Fig. S12** Galvanostatic discharge-charge profiles of the pristine CuS electrode at 1.0

A g<sup>-1</sup>.
